# Supplementary material for: Cold-tolerant phosphate-solubilizing Pseudomonas strains promote wheat growth and yield by improving soil phosphorous (P) nutrition status
Source: PubMed Central journal article supplement (PMC10072159; doi:10.3389/fmicb.2023.1135693), 2023-03-13
Supplement: Table_1.pdf [file Table_1.pdf]

| <b>Code</b> | <b>Treatments</b>       | <b>Field set 1</b> | <b>Field set 2</b> |
|-------------|-------------------------|--------------------|--------------------|
| <b>L3</b>   | <i>Pseudomonas sp.</i>  | L3 + RDF           | L3 - RDF           |
| <b>P2</b>   | <i>Pseudomonas sp.</i>  | P2 + RDF           | P2- RDF            |
| <b>T3</b>   | <i>Streptomyces sp.</i> | T3 + RDF           | T3- RDF            |
| <b>T4</b>   | <i>Micrococcus sp.</i>  | T4 + RDF           | T4- RDF            |
| <b>CNS</b>  | L3+P2                   | CNS + RDF          | CNS- RDF           |
| <b>C</b>    | Uninoculated control    | C + RDF            | C- RDF             |

**Table 1.** Treatments details of PSB strains along with their NCBI accession number used in two parallel fields set 1 and set 2 respectively.
