# Supplementary material for: Cold-tolerant phosphate-solubilizing Pseudomonas strains promote wheat growth and yield by improving soil phosphorous (P) nutrition status
Source: PubMed Central journal article supplement (PMC10072159; doi:10.3389/fmicb.2023.1135693), 2023-03-13
Supplement: Table_2.pdf [file Table_2.pdf]

| Treatment    | PIKOVSKYAS* |      | ALEXANDRO* |      | ASHBY* |      | K.B* |      | PCA* |      |
|--------------|-------------|------|------------|------|--------|------|------|------|------|------|
|              | F           | U    | F          | U    | F      | U    | F    | U    | F    | U    |
| <b>L3</b>    | 2.52        | 3.92 | 2.24       | 1.64 | 2.64   | 1.58 | 2.74 | 1.96 | 2.74 | 2.44 |
| <b>P2</b>    | 2.48        | 2.88 | 2.34       | 1.74 | 2.6    | 1.54 | 2.72 | 1.88 | 2.76 | 2.52 |
| <b>T3</b>    | 2.44        | 2.64 | 2.44       | 1.58 | 2.62   | 1.46 | 2.65 | 1.64 | 2.78 | 2.48 |
| <b>T4</b>    | 2.42        | 2.55 | 2.3        | 1.54 | 2.58   | 1.48 | 2.64 | 1.86 | 2.7  | 2.56 |
| <b>CNS</b>   | 2.55        | 2.12 | 2.26       | 1.78 | 2.66   | 1.54 | 2.76 | 2.22 | 2.86 | 2.66 |
| <b>CNTRL</b> | 2.46        | 2    | 2.2        | 1.68 | 2.56   | 1.62 | 2.48 | 2.1  | 2.7  | 2.54 |

**Table 2.** Population count after final harvesting in both field set 1(**F**-PSB+RDF) and field set 2 (**U**-PSB-RDF). (\*population =  $\times 10^4$  counts).
