# Supplementary material for: Cold-tolerant phosphate-solubilizing Pseudomonas strains promote wheat growth and yield by improving soil phosphorous (P) nutrition status
Source: PubMed Central journal article supplement (PMC10072159; doi:10.3389/fmicb.2023.1135693), 2023-03-13
Supplement: Table_3.pdf [file Table_3.pdf]

| Treatments | FS I (PSB+ RDF) |                            |                            |                            | FS II (PSB - RDF) |                            |                            |                            |
|------------|-----------------|----------------------------|----------------------------|----------------------------|-------------------|----------------------------|----------------------------|----------------------------|
|            | OC (%)          | N<br>(Kgha <sup>-1</sup> ) | P<br>(Kgha <sup>-1</sup> ) | K<br>(Kgha <sup>-1</sup> ) | OC (%)            | N<br>(Kgha <sup>-1</sup> ) | P<br>(Kgha <sup>-1</sup> ) | K<br>(Kgha <sup>-1</sup> ) |
| L3         | 0.84            | 274.64                     | 21.42                      | 188.63                     | 0.78              | 240.16                     | 21                         | 178.66                     |
| P2         | 0.71            | 268.63                     | 22.6                       | 178.56                     | 0.72              | 242.66                     | 20.8                       | 176.56                     |
| T3         | 0.76            | 262.46                     | 20.84                      | 184.66                     | 0.66              | 234.62                     | 19.64                      | 174.56                     |
| T4         | 0.78            | 262                        | 21.64                      | 180.26                     | 0.68              | 238.66                     | 20.84                      | 172.28                     |
| CNS        | 0.88            | 280.44                     | 24.2                       | 192.06                     | 0.76              | 241.65                     | 21.68                      | 174.54                     |
| C          | 0.66            | 236.54                     | 20                         | 176.68                     | 0.6               | 232.46                     | 18.68                      | 170.2                      |

**Table 3.** Effect of PSB on soil physico-chemical properties in two field set (FS) I and field set (FS II) 2 respectively, where OC= organic carbon, N=nitrogen, P=phosphorous and K= potassium.
